# Supplementary figures and images for: Anti-Neurofascin–Associated Nephrotic-Range Proteinuria in Chronic Inflammatory Demyelinating Polyneuropathy
Source: PubMed Central journal article supplement — Kidney Med. 2020 Oct 23;2(6):797–800. doi: 10.1016/j.xkme.2020.06.016 (PMC7729218; doi:10.1016/j.xkme.2020.06.016), 2020-10-23

Figure S1

Motor NCS R Peroneal - EDS

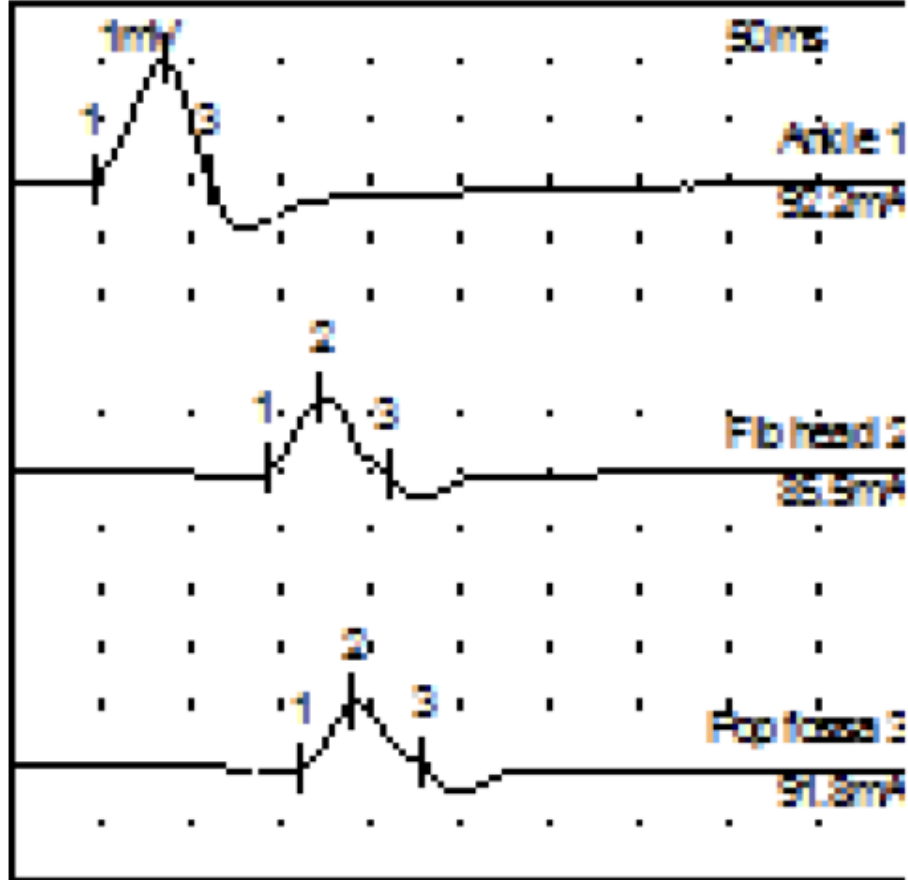

F Wave R Tibial - AH

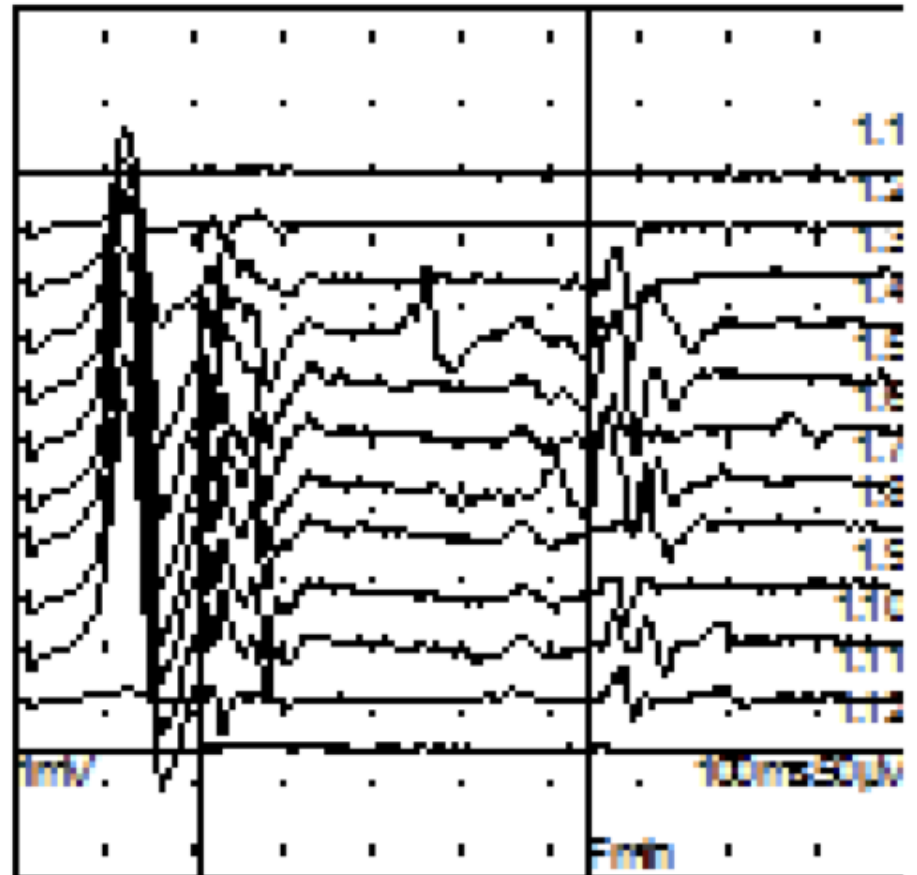

Supplement: mmc1.pdf [file mmc1.pdf]
